# Supplementary material
Source: publisher figshare collection journal article supplement (https://karger.figshare.com/articles/dataset/_/6965441)
Supplement: Supplementary file 1 [file 1]

Archive with 2 entries (2 files):
- MSY000452_Suppl_Fig1x.pdf
- MSY000452_Suppl_T01x.PDF
