# Supplementary material
Source: publisher figshare collection journal article supplement (https://karger.figshare.com/articles/dataset/_/6965441)
Supplement: Supplementary file 1 [file 1 › MSY000452_Suppl_Fig1x.pdf]

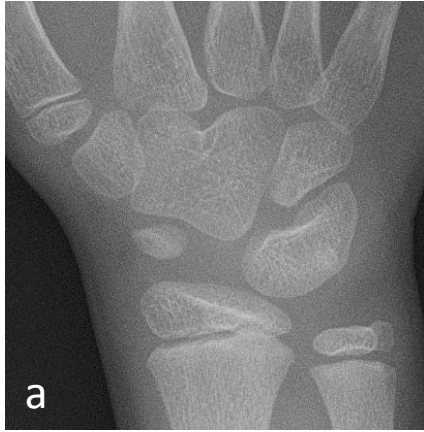

Patient IV-3 at 8 years and 8 months

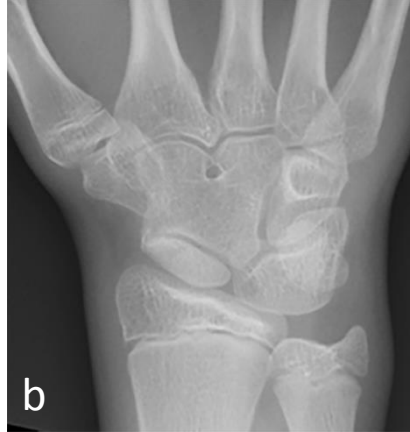

Patient IV-4 at 14 years

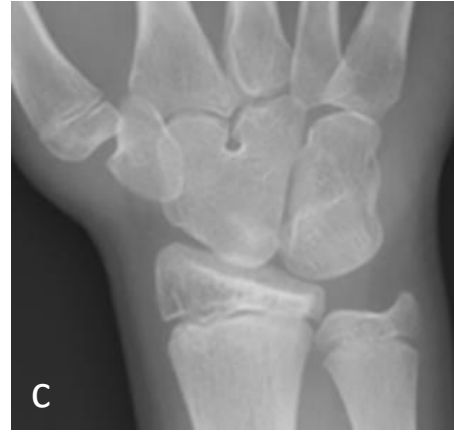

Patient IV-2 at 14 years

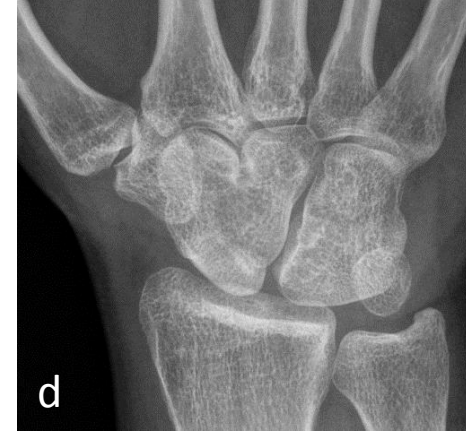

Patient III-3 at 49 years

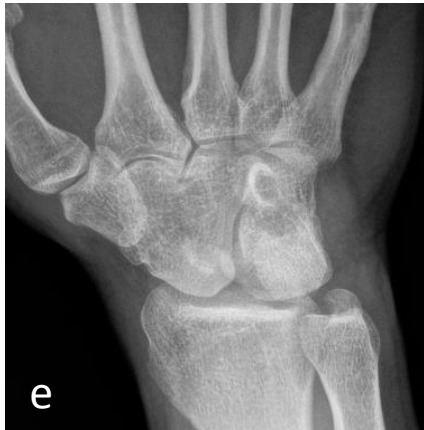

Patient III-4 at 47 years

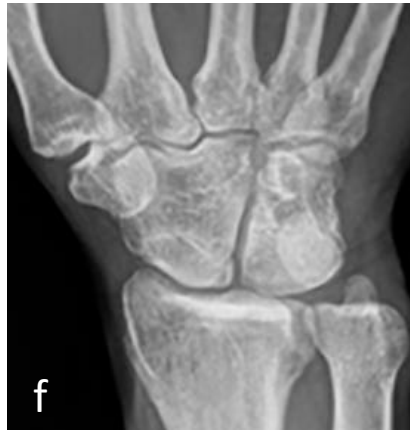

Patient II-3 at 73 years
