# Supplementary material
Source: publisher figshare collection journal article supplement (https://karger.figshare.com/articles/dataset/_/6965441)
Supplement: Supplementary file 1 [file 1 › MSY000452_Suppl_T01x.PDF]

**Supplementary table S1.** Clinical information in patients with multiple synostoses syndrome type 4. The radiographic findings were bilateral and symmetrical.

| ID in pedigree | Age | Gender | GDF6 c.1197C>A | Clinical examination                                                                       | Radiograph of the hands                                                                                                                                  | Radiograph of the feet                                                                                                                                                                                                                                                                                                                                                                                                 | Hearing loss |
|----------------|-----|--------|----------------|--------------------------------------------------------------------------------------------|----------------------------------------------------------------------------------------------------------------------------------------------------------|------------------------------------------------------------------------------------------------------------------------------------------------------------------------------------------------------------------------------------------------------------------------------------------------------------------------------------------------------------------------------------------------------------------------|--------------|
| IV-3           | 10  | Female | +              | Bilateral pes planus, valgus deformity ankles                                              | Fusion between the capitate and the trapezoid (with a small, adjacent scaphoid) and between the lunate and the triquetrum (lying adjacent to the hamate) | Fusion between the talus and navicular, which is partly fused to the intermediate and the lateral cuneiforms. Fused 3 <sup>rd</sup> and partially fused 2 <sup>nd</sup> and 4 <sup>th</sup> tarsometatarsal joints. Fused middle and distal phalanges of the 5 <sup>th</sup> toe. Cone epiphysis to the proximal phalanges of the 2 <sup>nd</sup> to 4 <sup>th</sup> toes and hypoplastic middle and distal phalanges. | No           |
| IV-2           | 14  | Male   | +              | Bilateral cutaneous syndactyly between 2 <sup>nd</sup> and 3 <sup>rd</sup> toe, pes planus | Fusion between the capitate, the scaphoid and the trapezoid and between the hamate, the lunate and the triquetrum.                                       | Fusion of the talus, the navicular and the intermediate and lateral cuneiform bones. Fused 4 <sup>th</sup> tarsometatarsal joint. Fused middle- and distal phalanges of the 5 <sup>th</sup> toe. Cone epiphysis to the proximal phalanges of the 2 <sup>nd</sup> to 4 <sup>th</sup> toes and hypoplastic middle and distal phalanges.                                                                                  | No           |
| III-3          | 49  | Female | +              | Bilateral broad forefeet, overlapping toes and pes planus                                  | Fusion between the capitate, the scaphoid and the trapezoid and between the hamate, the lunate and the triquetrum.                                       | Fusion of the talus, the navicular, the intermediate and lateral cuneiforms and the cuboid bones. Most likely also the calcaneus. Fused 2 <sup>nd</sup> , 3 <sup>rd</sup> and 4 <sup>th</sup> tarsometatarsal joints. Fused middle- and distal phalanges of the                                                                                                                                                        | No           |

|       |    |      |   |                                                              |                                                                                                                    |                                                                                                                                                                                                                                                                                                           |             |
|-------|----|------|---|--------------------------------------------------------------|--------------------------------------------------------------------------------------------------------------------|-----------------------------------------------------------------------------------------------------------------------------------------------------------------------------------------------------------------------------------------------------------------------------------------------------------|-------------|
|       |    |      |   |                                                              |                                                                                                                    | 5 <sup>th</sup> toe. Hypoplastic mid- and distal phalanges, and short proximal phalanges of the 2 <sup>nd</sup> to 4 <sup>th</sup> toes.                                                                                                                                                                  |             |
| II-3  | 73 | Male | + | Bilateral broad forefeet, overlapping toes and pes planus    | Fusion between the capitate, the scaphoid and the trapezoid and between the hamate, the lunate and the triquetrum. | Fusion of the talus, the navicular, the calcaneus, the intermediate and lateral cuneiforms and cuboid bones. Fused middle- and distal phalanges of the 5 <sup>th</sup> toe. Hypoplastic mid- and distal phalanges, and shortish proximal phalanges of the 2 <sup>nd</sup> to 4 <sup>th</sup> toes.        | Presbycusis |
| III-4 | 47 | Male | + | Bilateral broad forefeet, overlapping toes.<br>Brachydactyly | Fusion of trapezoid, capitate, and scaphoid bones, fused lunatum, triquetrum and hamatum bones.                    | Fusion of the talus, the navicular, the intermediate and lateral cuneiforms, the cuboid and the calcaneus. Fused 2 <sup>nd</sup> and 3 <sup>rd</sup> tarsometatarsal joint. Hypoplastic mid- and distal phalanges, and shortish proximal phalanges of the 2 <sup>nd</sup> to 4 <sup>th</sup> toes.        | No          |
| IV-4  | 14 | Male | + | Bilateral broad forefeet, overlapping toes                   | Fusion of the trapezoid, capitate and scaphoid bones, and of the lunate and the triquetrum.                        | Fusion of the talus and the navicular bones, which are partly fused with the lateral cuneiform. Fusion of the medial and intermediate cuneiforms. Fused 2 <sup>nd</sup> and 3 <sup>rd</sup> tarsometatarsal joints. Hypoplastic mid- and distal phalanges of the 2 <sup>nd</sup> to 5 <sup>th</sup> toes. | No          |
